# Supplementary material
Source: publisher site journal article supplement (https://dez.pensoft.net/article/55732/download/suppl/34/)
Supplement: Supplementary file 1

**Appendix 4** List of specimens used for DNA barcoding, including ID number, genus, species, sex, sequencing number and status of sequencing.

| ID       | Genus           | Species           | Sex    | Sequencing number | Status                      |
|----------|-----------------|-------------------|--------|-------------------|-----------------------------|
| 36       | <i>Colletes</i> | <i>brevigena</i>  | male   | BK22              | contamination               |
| 37       | <i>Colletes</i> | <i>brevigena</i>  | male   | BK15              | contamination               |
| 39       | <i>Colletes</i> | <i>brevigena</i>  | male   | BK33              | DNA extraction unsuccessful |
| 40       | <i>Colletes</i> | <i>brevigena</i>  | male   | BK11              | contamination               |
| 41       | <i>Colletes</i> | <i>brevigena</i>  | male   | BK34              | bad signal                  |
| 42       | <i>Colletes</i> | <i>brevigena</i>  | female | BK21              | contamination               |
| 44       | <i>Colletes</i> | <i>brevigena</i>  | female | BK37              | sequencing successful       |
| 45       | <i>Colletes</i> | <i>brevigena</i>  | female | BK32              | DNA extraction unsuccessful |
| 46       | <i>Colletes</i> | <i>brevigena</i>  | male   | BK13              | contamination               |
| 47       | <i>Colletes</i> | <i>brevigena</i>  | male   | BK19              | contamination               |
| 48       | <i>Colletes</i> | <i>brevigena</i>  | male   | BK31              | DNA extraction unsuccessful |
|          |                 |                   |        | BK38              | sequencing successful       |
| 68       | <i>Colletes</i> | <i>brevigena</i>  | female | BK35              | DNA extraction unsuccessful |
| 73       | <i>Colletes</i> | <i>brevigena</i>  | female | BK16              | contamination               |
|          |                 |                   |        | BK36              | DNA extraction unsuccessful |
| 74       | <i>Colletes</i> | <i>brevigena</i>  | female | BK18              | contamination               |
| 75       | <i>Colletes</i> | <i>brevigena</i>  | female | BK14              | contamination               |
| 77       | <i>Colletes</i> | <i>brevigena</i>  | female | BK12              | contamination               |
| 78       | <i>Colletes</i> | <i>brevigena</i>  | female | BK20              | contamination               |
| 79       | <i>Colletes</i> | <i>brevigena</i>  | female | BK17              | contamination               |
| 103      | <i>Colletes</i> | <i>succinctus</i> | male   | BK29              | sequencing successful       |
| 104      | <i>Colletes</i> | <i>succinctus</i> | male   | BK28              | sequencing successful       |
| 136      | <i>Colletes</i> | <i>succinctus</i> | male   | BK30              | sequencing successful       |
| 163      | <i>Colletes</i> | <i>pannonicus</i> | female | BK25              | sequencing successful       |
| 169      | <i>Colletes</i> | <i>pannonicus</i> | female | BK27              | bad signal                  |
| 173      | <i>Colletes</i> | <i>pannonicus</i> | female | BK26              | sequencing successful       |
| 190      | <i>Colletes</i> | <i>brevigena</i>  | female | BK10              | contamination               |
|          |                 |                   |        | BK23              | sequencing successful       |
| 191      | <i>Colletes</i> | <i>collaris</i>   | female | BK7               | sequencing successful       |
| 192      | <i>Colletes</i> | <i>collaris</i>   | female | BK8               | sequencing successful       |
| 193      | <i>Colletes</i> | <i>collaris</i>   | female | BK9               | sequencing successful       |
| 195      | <i>Colletes</i> | <i>collaris</i>   | female | BK6               | sequencing successful       |
|          |                 |                   |        | BK24              | bad signal                  |
| 197      | <i>Colletes</i> | <i>hederae</i>    | male   | 7342              | bad signal                  |
| 199      | <i>Colletes</i> | <i>hederae</i>    | female | 7339              | <i>Wolbachia</i>            |
| 200      | <i>Colletes</i> | <i>hederae</i>    | female | 7340              | bad signal                  |
| 201      | <i>Colletes</i> | <i>hederae</i>    | female | 7341              | bad signal                  |
| 217      | <i>Colletes</i> | <i>hederae</i>    | female | P3                | sequencing successful       |
| 220      | <i>Colletes</i> | <i>hederae</i>    | female | BK1               | sequencing successful       |
| 221      | <i>Colletes</i> | <i>hederae</i>    | female | BK2               | sequencing successful       |
| 231      | <i>Colletes</i> | <i>pannonicus</i> | female | 7249              | bad signal                  |
| 232      | <i>Colletes</i> | <i>pannonicus</i> | female | 7250              | <i>Wolbachia</i>            |
| 233      | <i>Colletes</i> | <i>pannonicus</i> | female | 7251              | bad signal                  |
| 234      | <i>Colletes</i> | <i>succinctus</i> | female | 7344              | bad signal                  |
| 235      | <i>Colletes</i> | <i>succinctus</i> | female | BK3               | sequencing successful       |
| 240      | <i>Colletes</i> | <i>succinctus</i> | female | BK4               | sequencing successful       |
| 241      | <i>Colletes</i> | <i>succinctus</i> | male   | 7346              | sequencing successful       |
| 242      | <i>Colletes</i> | <i>succinctus</i> | male   | BK5               | sequencing successful       |
| 248      | <i>Colletes</i> | <i>hederae</i>    | male   | 7343              | bad signal                  |
| 262      | <i>Colletes</i> | <i>succinctus</i> | male   | 7345              | sequencing successful       |
| Outgroup | <i>Colletes</i> | <i>creticus</i>   | male   | 7348              | sequencing successful       |
